# Supplementary material for: Building flux capacity: Citizen scientists increase resolution of soil greenhouse gas fluxes
Source: PLoS One. 2018 Jul 5;13(7):e0198997. doi: 10.1371/journal.pone.0198997 (PMC6033390; doi:10.1371/journal.pone.0198997)
Supplement: S2 File — (XLSX) [file pone.0198997.s002.xlsx]

## Sheet: Loney GHG
Loney Meadow -Greenhouse Gas Survey - August 29-30, 2015
		Unacceptable	Poor	Satisfactory	Good	Excellent
	1. Please rate the following elements of your experience:	1	2	3	4	5
	a) quality of preparation materials	0	0	0	1	3
	b) rendezvous and welcome	0	0	0	2	7
	c) logistical arrangements (organization, scheduling etc.)	0	0	0	3	6
	d) health & safety briefings delivered by project staff	0	0	2	3	4
	e) training on field research tasks	0	0	0	1	8
	f) sense of involvement in the research	0	0	0	1	8
	g) explanation of relevance & significance of research	0	0	0	0	9
	h) overall support & leadership from the project staff	0	0	0	1	8
	i) overall satisfaction with project experience	0	0	0	1	8
	2. To what extent did participation on the project increase your understanding of:	1	2	3	4	5
	a) the environmental issues being addressed	0	0	1	2	5
	b) how the research relates to global environmental issues	0	0	0	3	5
	c) how the research is relevant to the local communities in which it is conducted	0	0	3	3	3
	d) why we need to collect data on greenhouse gas flux	0	0	0	3	6
	e) the value of meadow habitat to combatting climate change	0	0	1	5	3
	f) how the research will be used	0	0	1	5	3
	g) the general contributions of citizen science	0	0	0	2	7
	3. To what extent did participation on the project:	1	2	3	4	5
	a) provide an opportunity for you to make a meaningful contribution to improving the state of the planet	0	0	3	3	1
	b) increase your sense of personal connection to the natural world	0	0	1	4	3
	c) increase your confidence in your ability to make a difference towards a sustainable environment or community	0	0	3	3	2
	d) increase your commitment to take positive action towards a sustainable environment or community	0	0	1	4	3
	e) motivate you to include more environmental considerations in your day-to-day decision making	0	0	4	3	1
	4. Please rate how your participation has:	1	2	3	4	5
	a) increased your likelihood to recommend Sierra to Sea to others	0	0	0	2	5
	b) increased your commitment to citizen science	0	0	0	2	6

## Sheet: Standard Earthwatch Teams
Overall satisfaction with field/project experience		7-14 Day Standard Earthwatch Teams 2014	Sierra to Sea: Meadow GHG Campaign August 28-29, 2015
	Excellent	688	8
	Good	181	1
	Satisfactory	41	0
	Poor	1	0
	Unacceptable	0	0
	Total	911	9
