# Supplementary material for: Building flux capacity: Citizen scientists increase resolution of soil greenhouse gas fluxes
Source: PLoS One. 2018 Jul 5;13(7):e0198997. doi: 10.1371/journal.pone.0198997 (PMC6033390; doi:10.1371/journal.pone.0198997)
Supplement: S3 File — (XLSX) [file pone.0198997.s003.xlsx]

## Sheet: Metadata
2015 August 29-30
Site	Collar	Depth	Average Depth	Time	Measurement Time	Difference	Notes	Soil Temp	WC	Air Temp
Loney	1	7.1	8.7	0	11:58:00	00:00:00		14	7.6	18.96
Loney	1	10.3	8.7	1	12:13:00	00:15:00
Loney	1		8.7	2	12:27:00	00:29:00
Loney	2	7.8	9.65	0	12:02:00	00:00:00		19	13
Loney	2	11.5	9.65	1	12:17:00	00:15:00
Loney	2		9.65	2	12:31:00	00:29:00
Loney	3	9	9.7	0	12:04:00	12:04:00		15	4.1
Loney	3	10.4	9.7	1	12:19:00	00:15:00
Loney	3		9.7	2	12:34:00	00:30:00
Loney	5	8.2	9.75	0	12:06:00	12:06:00		19	7.1
Loney	5	11.3	9.75	1	12:21:00	00:15:00
Loney	5		9.75	2	12:36:00	00:30:00
Loney	6	8	8.9	0	12:09:00	12:09:00		15	5.6
Loney	6	9.8	8.9	1	12:24:00	00:15:00
Loney	6		8.9	2	12:40:00	00:31:00
Loney	7	11.4	11.45	0	11:52:00	11:52:00	septum came loose , pushed in within 1 sec or so	15	8.5
Loney	7	11.5	11.45	1	12:07:00	00:15:00
Loney	7		11.45	2	12:22:00	00:30:00
Loney	8	10.2	10.65	0	11:55:00	11:55:00		16	7.6
Loney	8	11.1	10.65	1	12:11:00	00:16:00
Loney	8		10.65	2	12:25:00	00:30:00
Loney	9	9.8	10.5	0	11:58:00	11:58:00		19	8.1
Loney	9	11.2	10.5	1	12:13:00	00:15:00
Loney	9		10.5	2	12:28:00	00:30:00
Loney	10	10.9	11.15	0	12:01:00	12:01:00		18	8.5
Loney	10	11.4	11.15	1	12:14:00	00:13:00
Loney	10		11.15	2	12:31:00	00:30:00
Loney	11	9.7	10.5	0	12:03:00	12:03:00		16	9
Loney	11	11.3	10.5	1	12:16:00	00:13:00
Loney	11		10.5	2	12:31:00	00:28:00
Loney	12	10.6	10.7	0	12:06:00	12:06:00		18	7.1
Loney	12	10.8	10.7	1	12:19:00	00:13:00
Loney	12		10.7	2	12:34:00	00:28:00
Loney	13	7.4	8.65	0	12:06:00	12:06:00		18	6.6
Loney	13	9.9	8.65	1	12:26:00	00:20:00		17.6
Loney	13		8.65	2	12:41:00	00:35:00
Loney	14	7.9	8.75	0	12:10:00	12:10:00		16	9.5
Loney	14	9.6	8.75	1	12:30:00	00:20:00
Loney	14		8.75	2	12:43:00	00:33:00		19
Loney	15	7.5	8.75	0	12:14:00	12:14:00	within 1/2 M there is a bee hole	14
Loney	15	10	8.75	1	12:32:00	00:18:00		14.7
Loney	15		8.75	2	12:45:00	00:31:00		17
Loney	16	7.1	8.5	0	12:16:00	12:16:00		14
Loney	16	9.9	8.5	1	12:34:00	00:18:00		13
Loney	16		8.5	2	12:48:00	00:32:00
Loney	17	8.5	8.9	0	12:20:00	12:20:00			4.1
Loney	17	9.3	8.9	1	12:37:00	00:17:00		15
Loney	17		8.9	2	12:50:00	00:30:00		15
Loney	18	9.5	10.1	0	12:24:00	12:24:00		17	6.6
Loney	18	10.7	10.1	1	12:39:00	00:15:00
Loney	18		10.1	2	12:52:00	00:28:00		16.5
Loney	19	10.5	11.1	0	12:06:00	12:06:00		13	4.6
Loney	19	11.7	11.1	1	12:22:00	00:16:00
Loney	19		11.1	2	12:38:00	00:32:00
Loney	20	9.9	10.55	0	12:09:00	12:09:00		15	4.1
Loney	20	11.2	10.55	1	12:24:00	00:15:00
Loney	20		10.55	2	12:39:00	00:30:00
Loney	21	10.5	10.65	0	12:12:00	12:12:00		17	8.5
Loney	21	10.8	10.65	1	12:26:00	00:14:00
Loney	21		10.65	2	12:41:00	00:29:00
Loney	22	9.5	10	0	12:15:00	12:15:00		19	9.5
Loney	22	10.5	10	1	12:30:00	00:15:00
Loney	22		10	2	12:45:00	00:30:00
Loney	23	10	10.1	0	12:18:00	12:18:00		15	6.1
Loney	23	10.2	10.1	1	12:33:00	00:15:00
Loney	23		10.1	2	12:47:00	00:29:00
Loney	24	9.6	10.5	0	12:20:00	12:20:00		19	6.1
Loney	24	11.4	10.5	1	12:35:00	00:15:00
Loney	24		10.5	2	12:50:00	00:30:00
Loney	25	8.3	9.25	0	11:56:00	11:56:00		14.5
Loney	25	10.2	9.25	1	12:11:00	00:15:00
Loney	25		9.25	2	12:26:00	00:30:00
Loney	26	9.8	10.3	0	11:59:00	11:59:00		15
Loney	26	10.8	10.3	1	12:14:00	00:15:00
Loney	26		10.3	2	12:29:00	00:30:00
Loney	27	10.3	10.9	0	12:02:00	12:02:00		15	8.1
Loney	27	11.5	10.9	1	12:17:00	00:15:00
Loney	27		10.9	2	12:32:00	00:30:00
Loney	28	8.4	9.1	0	12:05:00	12:05:00		14.5	14.9
Loney	28	9.8	9.1	1	12:20:00	00:15:00
Loney	28		9.1	2	12:35:00	00:30:00
Loney	30	10.5	10.85	0	12:08:00	12:08:00		19	7.1
Loney	30	11.2	10.85	1	12:23:00	00:15:00
Loney	30		10.85	2	12:38:00	00:30:00
Loney	31	8.4	9.15	0	11:57:00	11:57:00		18	5.6
Loney	31	9.9	9.15	1	12:12:00	00:15:00
Loney	31		9.15	2	12:27:00	00:30:00
Loney	33	9.9	10.45	0	12:02:00	12:02:00		15	12.5
Loney	33	11	10.45	1	12:17:00	00:15:00
Loney	33		10.45	2	12:32:00	00:30:00
Loney	34	9.6	10.2	0	12:05:00	12:05:00		18	8.1
Loney	34	10.8	10.2	1	12:20:00	00:15:00
Loney	34		10.2	2	12:35:00	00:30:00
Loney	35	8.7	9.95	0	12:07:00	12:07:00		15	13.5
Loney	35	11.2	9.95	1	12:22:00	00:15:00
Loney	35		9.95	2	12:37:00	00:30:00
Loney	37	11.2	11.85	0	12:10:00	12:10:00	moved 3 m south due to bee nest, collar next to dried up puddle/hole	16	8.1
Loney	37	12.5	11.85	1	12:25:00	00:15:00
Loney	37		11.85	2	12:40:00	00:30:00
Loney	38	10.5	11	0	12:07:00	12:07:00		17	10.5
Loney	38	11.5	11	1	12:22:00	00:15:00
Loney	38		11	2	12:37:00	00:30:00
Loney	39	11	11.4	0	12:03:00	12:03:00	1.5ft from cow pie	15	8.1
Loney	39	11.8	11.4	1	12:17:00	00:14:00
Loney	39		11.4	2	12:32:00	00:29:00
Loney	40	9	9.75	0	11:58:00	11:58:00		15	12.5
Loney	40	10.5	9.75	1	12:14:00	00:16:00
Loney	40		9.75	2	12:29:00	00:31:00
Loney	41	11	11.25	0	11:58:00	11:58:00		16	5.1
Loney	41	11.5	11.25	1	12:13:00	00:15:00
Loney	41		11.25	2	12:28:00	00:30:00
Loney	42	7	9.25	0	12:01:00	12:01:00		16	9.5
Loney	42	11.5	9.25	1	12:16:00	00:15:00
Loney	42		9.25	2	12:31:00	00:30:00
Loney	43	6.5	7.95	0	12:04:00	12:04:00		16	10
Loney	43	9.4	7.95	1	12:19:00	00:15:00
Loney	43		7.95	2	12:34:00	00:30:00
Loney	44	9.5	10.5	0	12:06:00	12:06:00		16.5	8.1
Loney	44	11.5	10.5	1	12:21:00	00:15:00
Loney	44		10.5	2	12:36:00	00:30:00
Loney	45	8.5	9.25	0	12:08:00	12:08:00	cow pie just east of chamber	16	6.6
Loney	45	10	9.25	1	12:23:00	00:15:00
Loney	45		9.25	2	12:38:00	00:30:00
Loney	46	9	9.75	0	12:10:00	12:10:00		17	5.6
Loney	46	10.5	9.75	1	12:25:00	00:15:00
Loney	46		9.75	2	12:40:00	00:30:00
Loney	47	8.9	9.35	0	12:03:00	12:03:00		17	5.1
Loney	47	9.8	9.35	1	12:18:00	00:15:00
Loney	47		9.35	2	12:37:00	00:34:00
Loney	49	9.9	10.35	0	12:09:00	12:09:00		16	5.1
Loney	49	10.8	10.35	1	12:24:00	00:15:00
Loney	49		10.35	2	12:42:00	00:33:00
Loney	50	9.8	10.4	0	12:12:00	12:12:00		16	8.5
Loney	50	11	10.4	1	12:27:00	00:15:00
Loney	50		10.4	2	12:46:00	00:34:00
Loney	51	9	9.75	0	12:05:00	12:05:00		17	9
Loney	51	10.5	9.75	1	12:22:00	00:17:00
Loney	51		9.75	2	12:39:00	00:34:00
Loney	52	9	9.5	0	12:08:00	12:08:00		21	12.5
Loney	52	10	9.5	1	12:27:00	00:19:00
Loney	52		9.5	2	12:41:00	00:33:00
Loney	53	9.5	9.75	0	12:12:00	12:12:00	cow pies close	18	10.5
Loney	53	10	9.75	1	12:29:00	00:17:00
Loney	53		9.75	2	12:43:00	00:31:00
Loney	54	8	9.5	0	12:14:00	12:14:00		23	4.6
Loney	54	11	9.5	1	12:32:00	00:18:00
Loney	54		9.5	2	12:46:00	00:32:00
Loney	55	8.5	9.5	0	12:18:00	12:18:00		18	6.1
Loney	55	10.5	9.5	1	12:35:00	00:17:00
Loney	55		9.5	2	12:49:00	00:31:00
Loney	56	9.5	10.25	0	12:20:00	12:20:00		21	7.1
Loney	56	11	10.25	1	12:37:00	00:17:00
Loney	56		10.25	2	12:51:00	00:31:00

## Sheet: Fluxes
			nmols CH4 m-2 s-1	umols CO2 m-2 s-1	nmols N2O m-2 s-1
Sampling date	Site	Collar	Flux CH4	Flux CO2	Flux N2O
20150829	Loney_Spatial	1	-0.0356171	2.33795	0.0169881
20150829	Loney_Spatial	2	-0.221608	1.71836	0.0165421
20150829	Loney_Spatial	3	0.09131	0.951917	-0.011179
20150829	Loney_Spatial	5	-0.132382	1.09367	-0.0322818
20150829	Loney_Spatial	6	0.291549	1.46765	0.0287615
20150829	Loney_Spatial	7	-0.822478	1.84655	-0.0142855
20150829	Loney_Spatial	8
20150829	Loney_Spatial	9	0.236776	0.764215	-0.0248743
20150829	Loney_Spatial	10
20150829	Loney_Spatial	11	-0.292216	0.681457	-0.0456061
20150829	Loney_Spatial	12	-0.488348	0.692595	-0.00240245
20150829	Loney_Spatial	13	-0.620949	2.01145	0.000528915
20150829	Loney_Spatial	14	-0.749494	1.01878	-0.0487499
20150829	Loney_Spatial	15	-0.367518	1.05125	0.0177789
20150829	Loney_Spatial	16	-0.628149	0.940151	-0.0175516
20150829	Loney_Spatial	17	0.0152906	0.736921	0.0826611
20150829	Loney_Spatial	18	-0.2434	0.920496	0.00513944
20150829	Loney_Spatial	19	-0.963402	0.695995	-0.085318
20150829	Loney_Spatial	20	-0.740898	0.9581	0.00510085
20150829	Loney_Spatial	21	-0.263445	0.860489	0.0194775
20150829	Loney_Spatial	22	-0.240763	0.901765	0.0224883
20150829	Loney_Spatial	23	-0.211662	0.735779	0.0338849
20150829	Loney_Spatial	24	0.215117	0.845015	-0.0265139
20150829	Loney_Spatial	25	-0.153893	0.697263	-0.0110426
20150829	Loney_Spatial	26	-1.04543	1.19332	0.00436813
20150829	Loney_Spatial	27	-0.188307	0.758328	-0.0222225
20150829	Loney_Spatial	28	0.141857	0.946526	-0.0113607
20150829	Loney_Spatial	30	-0.379918	0.917436	-0.0176494
20150829	Loney_Spatial	31	-0.529219	1.31842	0.0272676
20150829	Loney_Spatial	33	-1.69525	1.71427	0.0155424
20150829	Loney_Spatial	34	-1.00613	0.765947	-0.0257543
20150829	Loney_Spatial	35	-1.36624	1.6731	-0.0301072
20150829	Loney_Spatial	37	-0.467999	0.848503	-0.0354499
20150829	Loney_Spatial	38	-2.03143	1.28492	-0.0171078
20150829	Loney_Spatial	39	-0.214551	0.867898	0.0259998
20150829	Loney_Spatial	40	-2.37537	1.08913	-0.385425
20150829	Loney_Spatial	41	-0.961838	0.580217	0.00867979
20150829	Loney_Spatial	42	-0.25419	1.21495	0.00756236
20150829	Loney_Spatial	43	0.19984	1.02121	-0.00322636
20150829	Loney_Spatial	44	-0.0450374	0.991515	-0.0606992
20150829	Loney_Spatial	45	-0.34076	1.46579	0.0242861
20150829	Loney_Spatial	46	-0.183961	1.27155	-0.0104959
20150829	Loney_Spatial	47	-0.703813	0.90451	0.0753147
20150829	Loney_Spatial	49	-0.325359	0.809057	0.0568509
20150829	Loney_Spatial	50	0.171123	0.85029	-0.0199499
20150829	Loney_Spatial	51	0.372479	0.747928	0.0187981
20150829	Loney_Spatial	52	-0.90119	0.934157	-0.003377
20150829	Loney_Spatial	53	-0.712547	1.40958	0.0127165
20150829	Loney_Spatial	54	-0.381187	1.12614	0.0145006
20150829	Loney_Spatial	55	-0.492017	0.503648	-0.000127273
20150829	Loney_Spatial	56	0.575921	0.577757	0.0283518
