# Supplementary material for: Building flux capacity: Citizen scientists increase resolution of soil greenhouse gas fluxes
Source: PLoS One. 2018 Jul 5;13(7):e0198997. doi: 10.1371/journal.pone.0198997 (PMC6033390; doi:10.1371/journal.pone.0198997)
Supplement: S4 File — (XLSX) [file pone.0198997.s004.xlsx]

## Sheet: Fluxes
			nmols CH4 m-2 s-1	umols CO2 m-2 s-1	nmols N2O m-2 s-1
Sampling date	Site	Collar	Flux CH4	Flux CO2	Flux N2O
20150830	Loney_00:30	5	-0.676515	1.5268	0.0211461
20150830	Loney_00:30	6	-0.656975	1.7437	0.0372224
20150830	Loney_00:30	7	-0.568621	2.60078	0.0218228
20150830	Loney_00:30	8	-0.46441	1.03804	-0.0300575
20150830	Loney_00:30	19	-0.0013943	1.34161	-0.0112733
20150830	Loney_00:30	24	-0.241385	1.24899	0.00796013
20150830	Loney_00:30	13	-1.20467	1.54155	0.0140121
20150830	Loney_00:30	14	-0.411525	1.49319	0.0250843
20150830	Loney_00:30	31	-0.450601	1.56177	0.00492483
20150830	Loney_00:30	37	-0.491611	1.34814	-0.0354858
20150830	Loney_00:30	38	-0.762948	1.61913	0.00455218
20150830	Loney_00:30	41
20150830	Loney_00:30	27	-0.292033	1.02511	0.0342001
20150830	Loney_00:30	46	-0.644035	1.57516	0.000190413
20150830	Loney_00:30	49	-0.986799	1.16052	-0.0207076
20150830	Loney_00:30	50	-0.922967	1.58099	-0.0227641
20150830	Loney_00:30	53	-0.809551	1.53754	-0.0267232
20150830	Loney_00:30	54	-1.09981	1.48854	0.0246889
20150830	Loney_02:30	5	-0.696112	1.66331	-0.00407059
20150830	Loney_02:30	6	-1.22761	2.00973	-0.034053
20150830	Loney_02:30	7	-1.08141	2.32947	0.0423399
20150830	Loney_02:30	8	-1.17634	0.899724	-0.030677
20150830	Loney_02:30	19	0.201202	1.29088	0.0207443
20150830	Loney_02:30	24	-0.0581849	1.1174	0.0045959
20150830	Loney_02:30	27	-1.13232	1.00085	-0.0119432
20150830	Loney_02:30	46
20150830	Loney_02:30	49	-1.26212	1.15411	0.0045135
20150830	Loney_02:30	50	-0.252063	1.50516	0.00900069
20150830	Loney_02:30	53	-1.08595	1.37191	-0.0500161
20150830	Loney_02:30	54	-0.690425	1.3874	0.000679638
20150830	Loney_04:30	5	-0.844217	1.40783	-0.0217997
20150830	Loney_04:30	6	-1.18547	1.87902	-0.0255924
20150830	Loney_04:30	7	-0.357757	2.40383	0.0192253
20150830	Loney_04:30	8	-0.388849	0.880322	0.00673137
20150830	Loney_04:30	19	-0.808062	1.23249	-0.023157
20150830	Loney_04:30	24	-0.179247	1.19362	0.0150131
20150830	Loney_04:30	13	-0.761079	1.61912	-0.0309952
20150830	Loney_04:30	14	-1.26734	1.38157	-0.0108838
20150830	Loney_04:30	31	-0.671655	1.31245	-0.0196151
20150830	Loney_04:30	37	-0.143393	1.32176	0.00100502
20150830	Loney_04:30	38	-0.666906	1.56899	0.00779278
20150830	Loney_04:30	41	-0.358672	0.753924	-0.0201761
20150830	Loney_04:30	27	-0.0814538	1.05061	0.031999
20150830	Loney_04:30	46	-1.14251	1.64414	0.0539457
20150830	Loney_04:30	49	-0.369077	1.14715	0.00373624
20150830	Loney_04:30	50	-1.27017	1.47258	-0.00421779
20150830	Loney_04:30	53	-0.373548	1.5172	0.0270446
20150830	Loney_04:30	54	-0.733493	1.31907	0.0429135
20150830	Loney_06:30	5	-0.316648	1.50442	0.115118
20150830	Loney_06:30	6	-0.858176	1.86281	0.0282945
20150830	Loney_06:30	7	-1.38268	2.16801	0.0231808
20150830	Loney_06:30	8	-0.595461	1.11015	0.0067416
20150830	Loney_06:30	19	-0.496909	0.931108	-0.0723454
20150830	Loney_06:30	24	-0.558539	1.20299	0.0166955
20150830	Loney_06:30	13	-1.49771	1.24104	-0.1114
20150830	Loney_06:30	14	-0.658667	1.27366	0.0225959
20150830	Loney_06:30	31	-1.338	1.23052	-0.0442068
20150830	Loney_06:30	37	-0.571085	1.22027	0.00852858
20150830	Loney_06:30	38	-0.632854	1.36132	0.00446459
20150830	Loney_06:30	41	-0.867343	0.812899	-0.104666
20150830	Loney_06:30	27	-1.267	0.920737	-0.0476018
20150830	Loney_06:30	46	-0.545543	1.51793	-0.0117728
20150830	Loney_06:30	49	-0.918857	1.17659	0.0140017
20150830	Loney_06:30	50	-0.719435	1.60336	0.00648488
20150830	Loney_06:30	53	-0.924512	1.26983	-0.0587815
20150830	Loney_06:30	54	-0.996626	1.19051	0.00195826
20150830	Loney_08:30	5	-0.952643	1.32866	-0.0981858
20150830	Loney_08:30	6	-0.294097	2.34193	0.054889
20150830	Loney_08:30	7	-1.11672	2.34563	-0.0180663
20150830	Loney_08:30	8	-0.167969	1.23961	0.0125589
20150830	Loney_08:30	19	-0.179724	1.60489	0.00892483
20150830	Loney_08:30	24	-0.306471	1.26209	0.0056953
20150830	Loney_08:30	13	-0.589414	2.10418	-0.0166046
20150830	Loney_08:30	14	-0.606587	1.62075	0.0288567
20150830	Loney_08:30	31	-0.234432	1.64126	0.0143569
20150830	Loney_08:30	37	-0.334581	1.31145	-0.0148709
20150830	Loney_08:30	38	-0.699685	1.56763	0.00804254
20150830	Loney_08:30	41	-0.35506	0.666245	-0.00516213
20150830	Loney_08:30	27	-0.603655	1.24549	-0.0102975
20150830	Loney_08:30	46	-0.699111	1.28361	-0.0139318
20150830	Loney_08:30	49	-0.634429	1.2104	-0.0133682
20150830	Loney_08:30	50	-0.2254	1.6463	-0.00785784
20150830	Loney_08:30	53	-0.948769	1.7562	0.0160013
20150830	Loney_08:30	54	-0.746507	1.74505	-0.00143069
20150830	Loney_10:30	5	-1.24727	1.83645	-0.0127613
20150830	Loney_10:30	6	-0.937856	2.00245	0.0154689
20150830	Loney_10:30	7	-0.60428	2.68951	-0.0117659
20150830	Loney_10:30	8	-0.24372	1.13755	0.0131022
20150830	Loney_10:30	19	0.0409014	1.88096	0.0083834
20150830	Loney_10:30	24	-0.271683	1.16102	-0.00615594
20150830	Loney_10:30	13	-0.652031	2.35755	0.0224576
20150830	Loney_10:30	14	-0.716685	1.7003	-0.000237629
20150830	Loney_10:30	31	-0.684476	1.87046	0.0142605
20150830	Loney_10:30	37	-0.331327	1.25624	0.0096024
20150830	Loney_10:30	38	-1.36496	1.87462	0.00372457
20150830	Loney_10:30	41	-0.0351475	0.546556	-0.000651654
20150830	Loney_10:30	27	-1.16614	1.48807	-0.0157082
20150830	Loney_10:30	46	-0.562432	1.7724	0.0111382
20150830	Loney_10:30	49	-0.753013	1.27053	0.0165618
20150830	Loney_10:30	50	-1.24768	2.02239	-0.0686135
20150830	Loney_10:30	53	-0.600378	2.2519	-0.00796765
20150830	Loney_10:30	54	-0.379605	2.11719	-0.0107286
20150829	Loney_12:30	5	-0.132382	1.09367	-0.0322818
20150829	Loney_12:30	6	0.291549	1.46765	0.0287615
20150829	Loney_12:30	7	-0.822478	1.84655	-0.0142855
20150829	Loney_12:30	8
20150829	Loney_12:30	13	-0.620949	2.01145	0.000528915
20150829	Loney_12:30	14	-0.749494	1.01878	-0.0487499
20150829	Loney_12:30	19	-0.963402	0.695995	-0.085318
20150829	Loney_12:30	24	0.215117	0.845015	-0.0265139
20150829	Loney_12:30	27	-0.188307	0.758328	-0.0222225
20150829	Loney_12:30	31	-0.529219	1.31842	0.0272676
20150829	Loney_12:30	37	-0.467999	0.848503	-0.0354499
20150829	Loney_12:30	38	-2.03143	1.28492	-0.0171078
20150829	Loney_12:30	41	-0.961838	0.580217	0.00867979
20150829	Loney_12:30	46	-0.183961	1.27155	-0.0104959
20150829	Loney_12:30	49	-0.325359	0.809057	0.0568509
20150829	Loney_12:30	50	0.171123	0.85029	-0.0199499
20150829	Loney_12:30	53	-0.712547	1.40958	0.0127165
20150829	Loney_12:30	54	-0.381187	1.12614	0.0145006
20150829	Loney_14:30	5	-0.926373	2.04535	0.0154803
20150829	Loney_14:30	6	-0.721901	2.40514	0.0276913
20150829	Loney_14:30	7	-0.96376	3.19479	-0.0113427
20150829	Loney_14:30	8	-0.07013	0.929309	-0.00584516
20150829	Loney_14:30	19	0.386638	1.92762	-0.00182055
20150829	Loney_14:30	24	-1.14825	0.943246	-0.0271901
20150829	Loney_14:30	13	-0.70049	2.70948	-0.0107669
20150829	Loney_14:30	14	-0.700649	2.36657	0.0322294
20150829	Loney_14:30	31	-0.485206	1.47731	-0.00688397
20150829	Loney_14:30	37	0.286862	0.712553	-0.0143201
20150829	Loney_14:30	38	0.39911	1.80355	0.0595862
20150829	Loney_14:30	41	-0.0420525	0.303293	0.00648296
20150829	Loney_14:30	27	-0.0961058	0.962197	0.032894
20150829	Loney_14:30	46	-0.311324	1.09546	0.0263012
20150829	Loney_14:30	49	-1.42499	1.03698	-0.0287871
20150829	Loney_14:30	50	-0.420301	1.69947	-0.00918074
20150829	Loney_14:30	53	-0.842471	1.97506	-0.00465291
20150829	Loney_14:30	54	-1.03468	1.69474	-0.00244559
20150829	Loney_16:30	5	-1.3086	1.75388	-0.0379011
20150829	Loney_16:30	6	-0.517813	2.16239	-0.00941785
20150829	Loney_16:30	7	-0.894347	2.44164	-0.00779922
20150829	Loney_16:30	8	-1.22605	0.925108	-0.0296913
20150829	Loney_16:30	19	-0.29894	1.63353	0.00129845
20150829	Loney_16:30	24	-0.129952	0.899532	0.00137234
20150829	Loney_16:30	13	-0.17294	1.87499	0.0617461
20150829	Loney_16:30	14	0.917419	2.04532	0.0612259
20150829	Loney_16:30	31	-0.612148	1.9823	0.0122897
20150829	Loney_16:30	37	0.124223	1.21704	-0.0157136
20150829	Loney_16:30	38	-1.19316	1.87823	-0.00776626
20150829	Loney_16:30	41	-0.548911	0.960296	-0.00608851
20150829	Loney_16:30	27	-0.479984	1.39212	0.0269797
20150829	Loney_16:30	46	-0.737968	1.87931	-0.00471567
20150829	Loney_16:30	49	-0.870919	1.1694	0.010394
20150829	Loney_16:30	50	-0.719101	1.80068	-0.0732662
20150829	Loney_16:30	53	-1.1866	2.23275	-0.00672042
20150829	Loney_16:30	54	-0.952438	1.7347	0.00775921
20150829	Loney_18:30	5	-1.10097	1.87558	0.0144175
20150829	Loney_18:30	6	-0.326635	2.03174	0.0478443
20150829	Loney_18:30	7	-0.916833	2.44874	0.00789256
20150829	Loney_18:30	8	0.645983	1.58916	0.03633
20150829	Loney_18:30	19	-0.0244126	1.68045	-0.0130926
20150829	Loney_18:30	24	-1.02601	1.26344	-0.0144928
20150829	Loney_18:30	13	-0.279521	1.98682	-0.0159411
20150829	Loney_18:30	14	-0.874832	1.76409	-0.00489306
20150829	Loney_18:30	31	-0.788854	1.94617	0.0110373
20150829	Loney_18:30	37
20150829	Loney_18:30	38	-0.591342	1.95841	0.060583
20150829	Loney_18:30	41	-0.408913	1.02894	0.059325
20150829	Loney_18:30	27	-2.04687	1.15781	-0.0452495
20150829	Loney_18:30	46	-1.42072	1.92793	-0.0100136
20150829	Loney_18:30	49	-1.99563	1.05397	-0.0428988
20150829	Loney_18:30	50	-0.198683	1.79831	0.0220466
20150829	Loney_18:30	53	-1.28697	2.15001	0.00459808
20150829	Loney_18:30	54	-0.223002	1.70688	0.0592908
20150829	Loney_20:30	5	-1.46155	1.57985	-0.0399547
20150829	Loney_20:30	6	-0.803041	1.90046	0.00680869
20150829	Loney_20:30	7	-1.01621	2.40447	-0.0134453
20150829	Loney_20:30	8	-0.145379	1.45333	0.00320694
20150829	Loney_20:30	19	-0.28103	1.35835	0.00489582
20150829	Loney_20:30	24	-0.663992	1.11694	-0.00434392
20150829	Loney_20:30	13	-1.12396	1.71707	-0.00217848
20150829	Loney_20:30	14	-0.423736	1.43755	0.0190187
20150829	Loney_20:30	31	-0.651938	1.61139	0.00279962
20150829	Loney_20:30	37	-0.257223	1.07944	0.0115407
20150829	Loney_20:30	38	-0.680467	1.6088	0.0109292
20150829	Loney_20:30	41	-0.539524	0.782161	-0.030323
20150829	Loney_20:30	27	-0.589361	1.2636	-0.0244231
20150829	Loney_20:30	46	-0.428187	1.71601	-0.0120885
20150829	Loney_20:30	49	-0.335148	1.08965	0.0367634
20150829	Loney_20:30	50	-0.203525	1.57034	0.00233262
20150829	Loney_20:30	53	-0.972865	1.54803	-0.00853262
20150829	Loney_20:30	54	-0.516285	1.55478	0.0208029
20150829	Loney_22:30	5	-0.875494	1.85633	0.0366882
20150829	Loney_22:30	6	-1.08107	1.89554	-0.00635751
20150829	Loney_22:30	7	-1.11118	2.87415	0.00255609
20150829	Loney_22:30	8	0.0474289	1.37394	0.0147941
20150829	Loney_22:30	19	-1.15394	1.12943	-0.0461303
20150829	Loney_22:30	24	-0.166957	1.47393	0.00240066
20150829	Loney_22:30	13	-0.0507438	1.71086	0.0179762
20150829	Loney_22:30	14	-0.774197	1.65239	-0.013256
20150829	Loney_22:30	31	-0.376028	1.41687	0.0121594
20150829	Loney_22:30	37	-2.57554	1.55232	-0.00168336
20150829	Loney_22:30	38	-1.02345	1.68121	0.0160476
20150829	Loney_22:30	41
20150829	Loney_22:30	27	-0.49287	1.18288	0.0396227
20150829	Loney_22:30	46	-0.468007	1.67854	0.0123133
20150829	Loney_22:30	49	-0.686101	0.97038	-0.0145122
20150829	Loney_22:30	50	-0.70497	1.72502	-0.0405151
20150829	Loney_22:30	53	-0.856196	1.51337	0.0912579
20150829	Loney_22:30	54	-0.71277	1.35218	-0.0069725

## Sheet: Metadata 0.30
2015 August 30		00:30:00
Site	Collar	Depth	Average Depth	Time	Measurement Time	Difference	Notes	Soil Temp	WC	Ambient Press	Air Temp
Loney	5	8.6	9.85	0	00:43:00	00:00:00		12	7.6	821	11.1
Loney	5	11.1	9.85	1	00:58:00	00:15:00
Loney	5		9.85	2	01:14:00	00:31:00
Loney	6	6.4	7.45	0	00:45:00	00:00:00		11	6.6
Loney	6	8.5	7.45	1	01:00:00	00:15:00
Loney	6		7.45	2	01:15:00	00:30:00
Loney	7	10.1	11.1	0	00:47:00	00:00:00		15	13.9
Loney	7	12.1	11.1	1	01:02:00	00:15:00
Loney	7		11.1	2	01:17:00	00:30:00
Loney	8	10	10.65	0	00:49:00	00:00:00		10.5	8.1
Loney	8	11.3	10.65	1	01:04:00	00:15:00
Loney	8		10.65	2	01:19:00	00:30:00
Loney	13	7.5	8.5	0	00:39:00	00:00:00		18	5.1
Loney	13	9.5	8.5	1	00:55:00	00:16:00
Loney	13		8.5	2	01:10:00	00:31:00
Loney	14	8	8.75	0	00:41:00	00:00:00		15	7.1
Loney	14	9.5	8.75	1	00:57:00	00:16:00
Loney	14		8.75	2	01:11:00	00:30:00
Loney	19	10.4	10.55	0	00:41:00	00:00:00		15	5.6
Loney	19	10.7	10.55	1	00:56:00	00:15:00
Loney	19		10.55	2	01:11:00	00:30:00
Loney	24	8.3	9.15	0	00:51:00	00:00:00		12.5	9
Loney	24	10	9.15	1	01:06:00	00:15:00
Loney	24		9.15	2	01:21:00	00:30:00
Loney	27	9.4	10	0	00:45:00	00:00:00		13	9.5
Loney	27	10.6	10	1	01:00:00	00:15:00
Loney	27		10	2	01:15:00	00:30:00
Loney	31	8	9	0	00:44:00	00:00:00		16	8.1
Loney	31	10	9	1	00:58:00	00:14:00
Loney	31		9	2	01:13:00	00:29:00
Loney	37	9	9.75	0	00:46:00	00:00:00		12	5.1
Loney	37	10.5	9.75	1	01:00:00	00:14:00
Loney	37		9.75	2	01:15:00	00:29:00
Loney	38	9	10	0	00:48:00	00:00:00		12	8.3
Loney	38	11	10	1	01:02:00	00:14:00
Loney	38		10	2	01:17:00	00:29:00
Loney	41	9.5	10.25	0	00:49:00	00:00:00		12	8.5
Loney	41	11	10.25	1	01:04:00	00:15:00
Loney	41		10.25	2	01:19:00	00:30:00
Loney	46	9.3	10.5	0	00:41:00	00:00:00		15	7.6
Loney	46	11.7	10.5	1	00:57:00	00:16:00
Loney	46		10.5	2	01:12:00	00:31:00
Loney	49	10.6	11.05	0	00:40:00	00:00:00		14	10.5
Loney	49	11.5	11.05	1	00:55:00	00:15:00
Loney	49		11.05	2	01:10:00	00:30:00
Loney	50	10.5	10.9	0	00:49:00	00:00:00		13	10
Loney	50	11.3	10.9	1	01:02:00	00:13:00
Loney	50		10.9	2	01:17:00	00:28:00
Loney	53	10.5	10.9	0	00:47:00	00:00:00		13	10
Loney	53	11.3	10.9	1	01:02:00	00:15:00
Loney	53		10.9	2	01:17:00	00:30:00
Loney	54	8.6	10	0	00:43:00	00:00:00		15	4.6
Loney	54	11.4	10	1	00:58:00	00:15:00
Loney	54		10	2	01:13:00	00:30:00

## Sheet: Metadata 2.30
2015 August 30		2:30AM
Site	Collar	Depth	Average Depth	Time	Measurement Time	Difference	Notes	Soil Temp	WC	Ambient Press	Air Temp
Loney	5	11	10.6	0	03:00:00	00:00:00		11	5.6	820	10.9
Loney	5	10.2	10.6	1	03:15:00	00:15:00
Loney	5		10.6	2	03:30:00	00:30:00
Loney	6	11.5	11.05	0	02:58:00	00:00:00		10	7.6
Loney	6	10.6	11.05	1	03:13:00	00:15:00
Loney	6		11.05	2	03:28:00	00:30:00
Loney	7	9.9	9.9	0	02:56:00	00:00:00		15	13.9
Loney	7	9.9	9.9	1	03:11:00	00:15:00
Loney	7		9.9	2	03:26:00	00:30:00
Loney	8	11.1	11.2	0	02:53:00	00:00:00		10	7.6
Loney	8	11.3	11.2	1	03:08:00	00:15:00
Loney	8		11.2	2	03:23:00	00:30:00
Loney	13		#DIV/0!	0		00:00:00
Loney	13		#DIV/0!	1		00:00:00
Loney	13		#DIV/0!	2		00:00:00
Loney	14		#DIV/0!	0		00:00:00
Loney	14		#DIV/0!	1		00:00:00
Loney	14		#DIV/0!	2		00:00:00
Loney	19	10.3	10.7	0	03:02:00	00:00:00		14	6.6
Loney	19	11.1	10.7	1	03:17:00	00:15:00
Loney	19		10.7	2	03:32:00	00:30:00
Loney	24	8	9.55	0	02:50:00	00:00:00		12	7.1
Loney	24	11.1	9.55	1	03:05:00	00:15:00
Loney	24		9.55	2	03:20:00	00:30:00
Loney	27	10.5	10.6	0	03:10:00	00:00:00		12	11.5
Loney	27	10.7	10.6	1	03:25:00	00:15:00
Loney	27		10.6	2	03:40:00	00:30:00
Loney	31		#DIV/0!	0		00:00:00
Loney	31		#DIV/0!	1		00:00:00
Loney	31		#DIV/0!	2		00:00:00
Loney	37		#DIV/0!	0		00:00:00
Loney	37		#DIV/0!	1		00:00:00
Loney	37		#DIV/0!	2		00:00:00
Loney	38		#DIV/0!	0		00:00:00
Loney	38		#DIV/0!	1		00:00:00
Loney	38		#DIV/0!	2		00:00:00
Loney	41		#DIV/0!	0		00:00:00
Loney	41		#DIV/0!	1		00:00:00
Loney	41		#DIV/0!	2		00:00:00
Loney	46	7.8	8.3	0	03:16:00	00:00:00	difficult to push	14	7.6
Loney	46	8.8	8.3	1	03:30:00	00:14:00
Loney	46		8.3	2	03:46:00	00:30:00
Loney	49	9.8	10.15	0	03:19:00	00:00:00		12	5.6
Loney	49	10.5	10.15	1	03:32:00	00:13:00
Loney	49		10.15	2	03:49:00	00:30:00
Loney	50	10.3	10.65	0	03:03:00	00:00:00		13	12
Loney	50	11	10.65	1	03:20:00	00:17:00
Loney	50		10.65	2	03:35:00	00:32:00
Loney	53	11.4	10.75	0	03:06:00	00:00:00		13	5.6
Loney	53	10.1	10.75	1	03:23:00	00:17:00
Loney	53		10.75	2	03:38:00	00:32:00
Loney	54	8.7	9.75	0	03:13:00	00:00:00		14	4.1
Loney	54	10.8	9.75	1	03:27:00	00:14:00
Loney	54		9.75	2	03:43:00	00:30:00

## Sheet: Metadata 4.30
2015 August 30		04:30:00
Site	Collar	Depth	Average Depth	Time	Measurement Time	Difference	Notes	Soil Temp	WC	Ambient Press	Air Temp
Loney	5	9.5	10.25	0	04:37:00	00:00:00		10.5	7.6	820	9.5
Loney	5	11	10.25	1	04:52:00	00:15:00
Loney	5		10.25	2	05:07:00	00:30:00
Loney	6	9.3	9.85	0	04:35:00	00:00:00		9	11.5
Loney	6	10.4	9.85	1	04:50:00	00:15:00
Loney	6		9.85	2	05:05:00	00:30:00
Loney	7	10	10.25	0	04:33:00	00:00:00		15	10.5
Loney	7	10.5	10.25	1	04:48:00	00:15:00
Loney	7		10.25	2	05:03:00	00:30:00
Loney	8	10.9	11	0	04:31:00	00:00:00		10	8.1
Loney	8	11.1	11	1	04:46:00	00:15:00
Loney	8		11	2	05:01:00	00:30:00
Loney	13	7.4	8	0	04:35:00	00:00:00		15	6.6
Loney	13	8.6	8	1	04:50:00	00:15:00
Loney	13		8	2	05:05:00	00:30:00
Loney	14	8.2	9	0	04:34:00	00:00:00		11	7.6
Loney	14	9.8	9	1	04:49:00	00:15:00
Loney	14		9	2	05:04:00	00:30:00
Loney	19	10.2	10.7	0	04:39:00	00:00:00		14	5.6
Loney	19	11.2	10.7	1	04:54:00	00:15:00
Loney	19		10.7	2	05:09:00	00:30:00
Loney	24	9.9	10.45	0	04:29:00	00:00:00		11	8.5
Loney	24	11	10.45	1	04:44:00	00:15:00
Loney	24		10.45	2	04:59:00	00:30:00
Loney	27	10.6	10.7	0	04:38:00	00:00:00		11	10.5
Loney	27	10.8	10.7	1	04:53:00	00:15:00
Loney	27		10.7	2	05:08:00	00:30:00
Loney	31	8.2	8.45	0	04:32:00	00:00:00		14	10
Loney	31	8.7	8.45	1	04:47:00	00:15:00
Loney	31		8.45	2	05:02:00	00:30:00
Loney	37	9.4	9.7	0	04:31:00	00:00:00		10	4.1
Loney	37	10	9.7	1	04:46:00	00:15:00
Loney	37		9.7	2	05:01:00	00:30:00
Loney	38	9.5	9.75	0	04:29:00	00:00:00		11	9
Loney	38	10	9.75	1	04:44:00	00:15:00
Loney	38		9.75	2	04:59:00	00:30:00
Loney	41	10.5	10.75	0	04:40:00	00:00:00	started late, bad exetainer	10	11.5
Loney	41	11	10.75	1	04:55:00	00:15:00
Loney	41		10.75	2	05:10:00	00:30:00
Loney	46	8.6	9.1	0	04:43:00	00:00:00		15	9
Loney	46	9.6	9.1	1	04:58:00	00:15:00
Loney	46		9.1	2	05:18:00	00:35:00
Loney	49	9.7	10.1	0	04:45:00	00:00:00		12	4.6
Loney	49	10.5	10.1	1	05:00:00	00:15:00
Loney	49		10.1	2	05:15:00	00:30:00
Loney	50	10.2	10.4	0	04:33:00	00:00:00		11	10
Loney	50	10.6	10.4	1	04:48:00	00:15:00
Loney	50		10.4	2	05:03:00	00:30:00
Loney	53	10.2	10.2	0	04:36:00	00:00:00		13	8.5
Loney	53	10.2	10.2	1	04:51:00	00:15:00
Loney	53		10.2	2	05:06:00	00:30:00
Loney	54	7	8.85	0	04:40:00	00:00:00		14	4.1
Loney	54	10.7	8.85	1	04:55:00	00:15:00
Loney	54		8.85	2	05:10:00	00:30:00

## Sheet: Metadata 6.30
2015 August 30		06:30:00
Site	Collar	Depth	Average Depth	Time	Measurement Time	Difference	Notes	Soil Temp	WC	Ambient Press	Air Temp	average temp
Loney	5	9	10	0	06:49:00	00:00:00		10	9.2			4.8
Loney	5	11	10	1	07:04:00	00:15:00
Loney	5		10	2	07:19:00	00:30:00
Loney	6	8	8.75	0	06:46:00	00:00:00		10	11.5	9.2
Loney	6	9.5	8.75	1	06:59:00	00:13:00
Loney	6		8.75	2	07:14:00	00:28:00
Loney	7	9.5	9.5	0	06:43:00	00:00:00		15	15.4
Loney	7	9.5	9.5	1	06:57:00	00:14:00
Loney	7		9.5	2	07:12:00	00:29:00
Loney	8	9.5	10	0	06:40:00	00:00:00		10	8.1
Loney	8	10.5	10	1	06:55:00	00:15:00
Loney	8		10	2	07:10:00	00:30:00
Loney	13	8.5	9	0	06:55:00	00:00:00		13.5	6.1
Loney	13	9.5	9	1	07:10:00	00:15:00
Loney	13		9	2	07:25:00	00:30:00
Loney	14	8.3	8.7	0	06:57:00	00:00:00		10.5	9
Loney	14	9.1	8.7	1	07:12:00	00:15:00
Loney	14		8.7	2	07:27:00	00:30:00
Loney	19	8.5	9.75	0	06:51:00	00:00:00		13	7.6
Loney	19	11	9.75	1	07:06:00	00:15:00
Loney	19		9.75	2	07:22:00	00:31:00
Loney	24	9	10	0	06:35:00	00:00:00		11	6.8
Loney	24	11	10	1	06:53:00	00:18:00
Loney	24		10	2	07:07:00	00:32:00
Loney	27	10.6	10.7	0	06:45:00	00:00:00		10	11.2
Loney	27	10.8	10.7	1	07:01:00	00:16:00
Loney	27		10.7	2	07:15:00	00:30:00
Loney	31	8.6	9.15	0	06:59:00	00:00:00		13	13
Loney	31	9.7	9.15	1	07:14:00	00:15:00
Loney	31		9.15	2	07:29:00	00:30:00
Loney	37	9.5	9.85	0	07:01:00	00:00:00		8.5	5.3
Loney	37	10.2	9.85	1	07:16:00	00:15:00
Loney	37		9.85	2	07:31:00	00:30:00				821	6.5
Loney	38	9.1	9.6	0	06:48:00	00:00:00		11.5	9.8	821	2.3
Loney	38	10.1	9.6	1	07:04:00	00:16:00				821	4.3
Loney	38		9.6	2	07:19:00	00:31:00				821	6.1
Loney	41	10.3	10.8	0	06:52:00	00:00:00		10	10.5
Loney	41	11.3	10.8	1	07:07:00	00:15:00
Loney	41		10.8	2	07:21:00	00:29:00
Loney	46	8.5	9.25	0	06:50:00	00:00:00		14	11.8
Loney	46	10	9.25	1	07:05:00	00:15:00
Loney	46		9.25	2	07:20:00	00:30:00
Loney	49	9.8	9.85	0	06:52:00	00:00:00		11	6.1
Loney	49	9.9	9.85	1	07:07:00	00:15:00
Loney	49		9.85	2	07:22:00	00:30:00
Loney	50	10.5	10.65	0	06:41:00	00:00:00		10	13
Loney	50	10.8	10.65	1	06:56:00	00:15:00
Loney	50		10.65	2	07:08:00	00:27:00
Loney	53	9.6	9.9	0	06:43:00	00:00:00		11	11
Loney	53	10.2	9.9	1	06:58:00	00:15:00
Loney	53		9.9	2	07:13:00	00:30:00
Loney	54	7.4	9.15	0	06:48:00	00:00:00		13	4.9
Loney	54	10.9	9.15	1	07:02:00	00:14:00
Loney	54		9.15	2	07:18:00	00:30:00

## Sheet: Metadata 8.30
2015 August 30		08:30:00
Site	Collar	Depth	Average Depth	Time	Measurement Time	Difference	Notes	Soil Temp	WC	Ambient Press	Air Temp	average temp
Loney	5	8.5	9.75	0	08:43:00	00:00:00		10	8.4			14.875
Loney	5	11	11	1	08:58:00	00:15:00
Loney	5		7	2	09:13:00	00:30:00
Loney	6	7	8	0	08:41:00	00:00:00		10	6.6
Loney	6	9	9	1	08:56:00	00:15:00
Loney	6		9.5	2	09:11:00	00:30:00
Loney	7	9.5	9.75	0	08:38:00	00:00:00		13	10
Loney	7	10	10	1	08:53:00	00:15:00
Loney	7		9.5	2	09:08:00	00:30:00
Loney	8	9.5	10.5	0	08:35:00	00:00:00		10	6.9
Loney	8	11.5	10.5	1	08:50:00	00:15:00
Loney	8		10.5	2	09:05:00	00:30:00
Loney	13	8.5	9.05	0	08:46:00	00:00:00		16	9
Loney	13	9.6	9.05	1	09:01:00	00:15:00
Loney	13		9.05	2	09:16:00	00:30:00
Loney	14	9.8	10.05	0	08:48:00	00:00:00		11.5	8.5
Loney	14	10.3	10.05	1	09:03:00	00:15:00
Loney	14		10.05	2	09:18:00	00:30:00
Loney	19	9.5	10	0	08:45:00	00:00:00		14	7.1
Loney	19	10.5	10	1	09:00:00	00:15:00
Loney	19		10	2	09:15:00	00:30:00
Loney	24	8.5	9.75	0	08:33:00	00:00:00		12	7.6
Loney	24	11	9.75	1	08:48:00	00:15:00
Loney	24		9.75	2	09:03:00	00:30:00
Loney	27	8.6	9.65	0	08:39:00	00:00:00		10	9.3
Loney	27	10.7	9.65	1	08:54:00	00:15:00
Loney	27		9.65	2	09:09:00	00:30:00
Loney	31	8.1	8.4	0	08:50:00	00:00:00		14	8.5
Loney	31	8.7	8.4	1	09:05:00	00:15:00
Loney	31		8.4	2	09:20:00	00:30:00
Loney	37	9.4	9.8	0	08:52:00	00:00:00		10	9
Loney	37	10.2	9.8	1	09:07:00	00:15:00
Loney	37		9.8	2	09:22:00	00:30:00				822	16.4
Loney	38	9	9.45	0	08:41:00	00:00:00		12.5	15.4	821	12.7
Loney	38	9.9	9.45	1	08:54:00	00:13:00				821	14.3
Loney	38		9.45	2	09:11:00	00:30:00				821	16.1
Loney	41	9.8	10.4	0	08:43:00	00:00:00		10.5	11.2
Loney	41	11	10.4	1	08:58:00	00:15:00
Loney	41		10.4	2	09:13:00	00:30:00
Loney	46	8.1	9.2	0	08:43:00	00:00:00		14	11
Loney	46	10.3	9.2	1	08:58:00	00:15:00
Loney	46		9.2	2	09:13:00	00:30:00
Loney	49	8.9	9.3	0	08:45:00	00:00:00		11	6.6
Loney	49	9.7	9.3	1	09:00:00	00:15:00
Loney	49		9.3	2	09:15:00	00:30:00
Loney	50	9.9	10.25	0	08:35:00	00:00:00		10	11.5
Loney	50	10.6	10.25	1	08:50:00	00:15:00
Loney	50		10.25	2	09:05:00	00:30:00
Loney	53	9.1	9.55	0	08:37:00	00:00:00		11	14.2
Loney	53	10	9.55	1	08:52:00	00:15:00
Loney	53		9.55	2	09:07:00	00:30:00
Loney	54	7.3	8.85	0	08:41:00	00:00:00		14	6.7
Loney	54	10.4	8.85	1	08:56:00	00:15:00
Loney	54		8.85	2	09:11:00	00:30:00

## Sheet: Metadata 10.30
2015 August 30		10:30:00
Site	Collar	Depth	Average Depth	Time	Measurement Time	Difference	Notes	Soil Temp	WC	Ambient Press	Air Temp
Loney	5	8.5	9.6	0	10:38:00	00:00:00		13	8.5	822	18.5
Loney	5	10.7	9.6	1	10:53:00	00:15:00
Loney	5		9.6	2	11:08:00	00:30:00
Loney	6	6.5	7.75	0	10:39:00	00:00:00		10.5	7.6
Loney	6	9	7.75	1	10:54:00	00:15:00
Loney	6		7.75	2	11:09:00	00:30:00
Loney	7	9.5	9.65	0	10:40:00	00:00:00		16	10.5
Loney	7	9.8	9.65	1	10:55:00	00:15:00
Loney	7		9.65	2	11:10:00	00:30:00
Loney	8	9.3	9.5	0	10:42:00	00:00:00		12	7.6
Loney	8	9.7	9.5	1	10:57:00	00:15:00
Loney	8		9.5	2	11:12:00	00:30:00
Loney	13	8.3	8.85	0	10:33:00	00:00:00		19	5.1
Loney	13	9.4	8.85	1	10:48:00	00:15:00
Loney	13		8.85	2	11:03:00	00:30:00
Loney	14	8.5	9.25	0	10:35:00	00:00:00		14	6.6
Loney	14	10	9.25	1	10:50:00	00:15:00
Loney	14		9.25	2	11:05:00	00:30:00
Loney	19	8.2	9.4	0	10:36:00	00:00:00		16	5.6
Loney	19	10.6	9.4	1	10:51:00	00:15:00
Loney	19		9.4	2	11:06:00	00:30:00
Loney	24	8.4	9.25	0	10:35:00	00:00:00		16	5.6
Loney	24	10.1	9.25	1	10:50:00	00:15:00
Loney	24		9.25	2	11:05:00	00:30:00
Loney	27	10	10.25	0	10:43:00	00:00:00		14	8.5
Loney	27	10.5	10.25	1	10:58:00	00:15:00
Loney	27		10.25	2	11:13:00	00:30:00
Loney	31	7.3	7.85	0	10:37:00	00:00:00		15	5.1
Loney	31	8.4	7.85	1	10:52:00	00:15:00
Loney	31		7.85	2	11:07:00	00:30:00
Loney	37	9.4	10.1	0	10:39:00	00:00:00		12	5.6
Loney	37	10.8	10.1	1	10:54:00	00:15:00
Loney	37		10.1	2	11:09:00	00:30:00
Loney	38	8.9	9.4	0	10:29:00	00:00:00		15	8.1
Loney	38	9.9	9.4	1	10:44:00	00:15:00
Loney	38		9.4	2	10:59:00	00:30:00
Loney	41	9.9	10.65	0	10:31:00	00:00:00		13	9.6
Loney	41	11.4	10.65	1	10:46:00	00:15:00
Loney	41		10.65	2	11:01:00	00:30:00
Loney	46	8.1	9.2	0	10:47:00	00:00:00		17	5.1
Loney	46	10.3	9.2	1	11:02:00	00:15:00
Loney	46		9.2	2	11:17:00	00:30:00
Loney	49	9.8	9.45	0	10:49:00	00:00:00		14	8.5
Loney	49	9.1	9.45	1	11:04:00	00:15:00
Loney	49		9.45	2	11:19:00	00:30:00
Loney	50	10	10.35	0	10:38:00	00:00:00	Thermo bent when came out	12	7.1
Loney	50	10.7	10.35	1	10:53:00	00:15:00
Loney	50		10.35	2	11:07:00	00:29:00
Loney	53	9.2	9.6	0	10:41:00	00:00:00		16	12
Loney	53	10	9.6	1	10:56:00	00:15:00
Loney	53		9.6	2	11:11:00	00:30:00
Loney	54	7	8.6	0	10:45:00	00:00:00		17	11
Loney	54	10.2	8.6	1	11:00:00	00:15:00
Loney	54		8.6	2	11:15:00	00:30:00

## Sheet: Metadata 12.30
2015 August 29
Site	Collar	Depth	Average Depth	Time	Measurement Time	Difference	Notes	Soil Temp	WC	Air Temp
Loney	5	8.2	9.75	0	12:06:00	12:06:00		19	7.1	18.96
Loney	5	11.3	9.75	1	12:21:00	00:15:00
Loney	5		9.75	2	12:36:00	00:30:00
Loney	6	8	8.9	0	12:09:00	12:09:00		15	5.6
Loney	6	9.8	8.9	1	12:24:00	00:15:00
Loney	6		8.9	2	12:40:00	00:31:00
Loney	7	11.4	11.45	0	11:52:00	11:52:00	septum came loose , pushed in within 1 sec or so	15	8.5
Loney	7	11.5	11.45	1	12:07:00	00:15:00
Loney	7		11.45	2	12:22:00	00:30:00
Loney	8	10.2	10.65	0	11:55:00	11:55:00		16	7.6
Loney	8	11.1	10.65	1	12:11:00	00:16:00
Loney	8		10.65	2	12:25:00	00:30:00
Loney	13	7.4	8.65	0	12:06:00	12:06:00		18	6.6
Loney	13	9.9	8.65	1	12:26:00	00:20:00		17.6
Loney	13		8.65	2	12:41:00	00:35:00
Loney	14	7.9	8.75	0	12:10:00	12:10:00		16	9.5
Loney	14	9.6	8.75	1	12:30:00	00:20:00
Loney	14		8.75	2	12:43:00	00:33:00		19
Loney	19	10.5	11.1	0	12:06:00	12:06:00		13	4.6
Loney	19	11.7	11.1	1	12:22:00	00:16:00
Loney	19		11.1	2	12:38:00	00:32:00
Loney	24	9.6	10.5	0	12:20:00	12:20:00		19	6.1
Loney	24	11.4	10.5	1	12:35:00	00:15:00
Loney	24		10.5	2	12:50:00	00:30:00
Loney	27	10.3	10.9	0	12:02:00	12:02:00		15	8.1
Loney	27	11.5	10.9	1	12:17:00	00:15:00
Loney	27		10.9	2	12:32:00	00:30:00
Loney	31	8.4	9.15	0	11:57:00	11:57:00		18	5.6
Loney	31	9.9	9.15	1	12:12:00	00:15:00
Loney	31		9.15	2	12:27:00	00:30:00
Loney	37	11.2	11.85	0	12:10:00	12:10:00	moved 3 m south due to bee nest, collar next to dried up puddle/hole	16	8.1
Loney	37	12.5	11.85	1	12:25:00	00:15:00
Loney	37		11.85	2	12:40:00	00:30:00
Loney	38	10.5	11	0	12:07:00	12:07:00		17	10.5
Loney	38	11.5	11	1	12:22:00	00:15:00
Loney	38		11	2	12:37:00	00:30:00
Loney	41	11	11.25	0	11:58:00	11:58:00		16	5.1
Loney	41	11.5	11.25	1	12:13:00	00:15:00
Loney	41		11.25	2	12:28:00	00:30:00
Loney	46	9	9.75	0	12:10:00	12:10:00		17	5.6
Loney	46	10.5	9.75	1	12:25:00	00:15:00
Loney	46		9.75	2	12:40:00	00:30:00
Loney	49	9.9	10.35	0	12:09:00	12:09:00		16	5.1
Loney	49	10.8	10.35	1	12:24:00	00:15:00
Loney	49		10.35	2	12:42:00	00:33:00
Loney	50	9.8	10.4	0	12:12:00	12:12:00		16	8.5
Loney	50	11	10.4	1	12:27:00	00:15:00
Loney	50		10.4	2	12:46:00	00:34:00
Loney	53	9.5	9.75	0	12:12:00	12:12:00	cow pies close	18	10.5
Loney	53	10	9.75	1	12:29:00	00:17:00
Loney	53		9.75	2	12:43:00	00:31:00
Loney	54	8	9.5	0	12:14:00	12:14:00		23	4.6
Loney	54	11	9.5	1	12:32:00	00:18:00
Loney	54		9.5	2	12:46:00	00:32:00

## Sheet: Metadata 14.30
2015 August 29		10:30:00
Site	Collar	Depth	Average Depth	Time	Measurement Time	Difference	Notes	Soil Temp	WC	Ambient Press	Air Temp	average temp
Loney	5	8.7	9.5	0	14:49:00	00:00:00		18.5	6.6			20.8
Loney	5	10.3	9.5	1	15:04:00	00:15:00
Loney	5		9.5	2	15:19:00	00:30:00
Loney	6	6	7.2	0	14:47:00	00:00:00		15	6.6
Loney	6	8.4	7.2	1	15:02:00	00:15:00
Loney	6		7.2	2	15:16:00	00:29:00
Loney	7	8.7	9.1	0	14:44:00	00:00:00		18.5	7
Loney	7	9.5	9.1	1	14:59:00	00:15:00
Loney	7		9.1	2	15:14:00	00:30:00
Loney	8	9	9.65	0	14:42:00	00:00:00		18	9
Loney	8	10.3	9.65	1	14:57:00	00:15:00
Loney	8		9.65	2	15:12:00	00:30:00
Loney	19	8.7	9.1	0	14:51:00	00:00:00		21	4.6
Loney	19	9.5	9.1	1	15:06:00	00:15:00
Loney	19		9.1	2	15:21:00	00:30:00				821	22
Loney	24	7.7	8.6	0	14:40:00	00:00:00		19	6.6
Loney	24	9.5	8.6	1	14:55:00	00:15:00				821	21.5
Loney	24		8.6	2	15:10:00	00:30:00				821	18.9
Loney	13	8	8.25	0	14:41:00	00:00:00		22	4.6
Loney	13	8.5	8.25	1	14:55:00	00:14:00
Loney	13		8.25	2	15:11:00	00:30:00
Loney	14	7.9	8.8	0	14:28:00	00:00:00		20	8.3
Loney	14	9.7	8.8	1	14:42:00	00:14:00
Loney	14		8.8	2	14:58:00	00:30:00
Loney	31	8.7	9.1	0	14:31:00	00:00:00		19	7.6
Loney	31	9.5	9.1	1	14:45:00	00:14:00
Loney	31		9.1	2	15:01:00	00:30:00
Loney	37	9.5	10.25	0	14:33:00	00:00:00		18.5	3.6
Loney	37	11	10.25	1	14:48:00	00:15:00
Loney	37		10.25	2	15:03:00	00:30:00
Loney	38	9.5	9.75	0	14:36:00	00:00:00		16	8.1
Loney	38	10	9.75	1	14:51:00	00:15:00
Loney	38		9.75	2	15:06:00	00:30:00
Loney	41	10.5	11	0	14:38:00	00:00:00		16	7.6
Loney	41	11.5	11	1	14:53:00	00:15:00
Loney	41		11	2	15:08:00	00:30:00
Loney	27	11.1	11.15	0	14:23:00	00:00:00	broke needle	18	9
Loney	27	11.2	11.15	1	14:43:00	00:20:00
Loney	27		11.15	2	15:01:00	00:38:00
Loney	46	8.8	9.2	0	14:32:00	00:00:00		20	9
Loney	46	9.6	9.2	1	14:47:00	00:15:00
Loney	46		9.2	2	15:05:00	00:33:00
Loney	49	10.6	10.75	0	14:35:00	00:00:00		17	4.6
Loney	49	10.9	10.75	1	14:49:00	00:14:00
Loney	49		10.75	2	15:06:00	00:31:00
Loney	50	10.2	10.35	0	14:16:00	00:00:00		19	9.5
Loney	50	10.5	10.35	1	14:38:00	00:22:00
Loney	50		10.35	2	14:53:00	00:37:00
Loney	53	9.8	10	0	14:19:00	00:00:00		16	9.5
Loney	53	10.2	10	1	14:41:00	00:22:00
Loney	53		10	2	14:56:00	00:37:00
Loney	54	10.3	10.6	0	14:26:00	00:00:00		19	3.6
Loney	54	10.9	10.6	1	14:45:00	00:19:00
Loney	54		10.6	2	15:03:00	00:37:00

## Sheet: Metadata 16.30
2015 August 29		10:30:00
Site	Collar	Depth	Average Depth	Time	Measurement Time	Difference	Notes	Soil Temp	WC	Ambient Press	Air Temp	average temp
Loney	5	8.9	9.9	0	16:50:00	00:00:00		17.5	10.5	821	17.1	17.3
Loney	5	10.9	9.9	1	17:06:00	00:16:00
Loney	5		9.9	2	17:22:00	00:32:00
Loney	6	8	8.5	0	16:49:00	00:00:00		15	10.5
Loney	6	9	8.5	1	17:04:00	00:15:00
Loney	6		8.5	2	17:20:00	00:31:00
Loney	7	9.3	9.6	0	16:46:00	00:00:00		18.5	16.9
Loney	7	9.9	9.6	1	17:01:00	00:15:00
Loney	7		9.6	2	17:17:00	00:31:00
Loney	8	9.9	10.25	0	16:44:00	00:00:00		16.5	8.1
Loney	8	10.6	10.25	1	16:59:00	00:15:00
Loney	8		10.25	2	17:13:00	00:29:00
Loney	13	7.8	8.85	0	16:47:00	00:00:00		20.5	6.6
Loney	13	9.9	8.85	1	17:02:00	00:15:00
Loney	13		8.85	2	17:17:00	00:30:00
Loney	14	8.5	9.25	0	16:36:00	00:00:00		19	7.6
Loney	14	10	9.25	1	16:51:00	00:15:00
Loney	14		9.25	2	17:06:00	00:30:00
Loney	19	9.1	9.75	0	16:53:00	00:00:00		19.5	5.6
Loney	19	10.4	9.75	1	17:08:00	00:15:00
Loney	19		9.75	2	17:24:00	00:31:00				821	17.1
Loney	24	8.1	9.15	0	16:40:00	00:00:00		18.5	7.1	821	17.8
Loney	24	10.2	9.15	1	16:55:00	00:15:00				821	17.5
Loney	24		9.15	2	17:12:00	00:32:00				821	17
Loney	27	11.1	11.15	0	16:35:00	00:00:00		18	8.5
Loney	27	11.2	11.15	1	16:50:00	00:15:00
Loney	27		11.15	2	17:05:00	00:30:00
Loney	31	9.5	9.9	0	16:39:00	00:00:00		20	7.1
Loney	31	10.3	9.9	1	16:54:00	00:15:00
Loney	31		9.9	2	17:09:00	00:30:00
Loney	37	8.5	9.75	0	16:41:00	00:00:00		16	6.1
Loney	37	11	9.75	1	16:56:00	00:15:00
Loney	37		9.75	2	17:11:00	00:30:00
Loney	38	9.5	10.15	0	16:43:00	00:00:00		17	8.1
Loney	38	10.8	10.15	1	16:58:00	00:15:00
Loney	38		10.15	2	17:13:00	00:30:00
Loney	41	11.4	10.8	0	16:45:00	00:00:00		15	7.6
Loney	41	10.2	10.8	1	17:00:00	00:15:00
Loney	41		10.8	2	17:15:00	00:30:00
Loney	46	9	10.2	0	16:39:00	00:00:00		15	8.1
Loney	46	11.4	10.2	1	16:54:00	00:15:00
Loney	46		10.2	2	17:09:00	00:30:00
Loney	49	9.9	10.4	0	16:41:00	00:00:00		18	6.6
Loney	49	10.9	10.4	1	16:56:00	00:15:00
Loney	49		10.4	2	17:11:00	00:30:00
Loney	50	10.5	10.8	0	16:31:00	00:00:00		19	8.5
Loney	50	11.1	10.8	1	16:46:00	00:15:00
Loney	50		10.8	2	17:01:00	00:30:00
Loney	53	11.2	10.95	0	16:33:00	00:00:00		18	11.5
Loney	53	10.7	10.95	1	16:48:00	00:15:00
Loney	53		10.95	2	17:03:00	00:30:00
Loney	54	8.4	9.95	0	16:37:00	00:00:00		20	5.6
Loney	54	11.5	9.95	1	16:52:00	00:15:00
Loney	54		9.95	2	17:07:00	00:30:00

[truncated: 3 more sheets: Metadata 18.30, Metadata 20.30, Metadata 22.30]
